# Supplementary material for: Pulicaria undulata Extract-Mediated Eco-Friendly Preparation of TiO2 Nanoparticles for Photocatalytic Degradation of Methylene Blue and Methyl Orange
Source: PubMed Central journal article supplement — ACS Omega. 2022 Feb 2;7(6):4812–20. doi: 10.1021/acsomega.1c05090 (PMC8851443; doi:10.1021/acsomega.1c05090), 2022-02-02
Supplement: ao1c05090_si_001.pdf [file ao1c05090_si_001.pdf]

## Supplementary File

### ***Pulicaria undulata* Extract Mediated Eco-friendly Preparation of TiO<sub>2</sub> Nanoparticles for Photocatalytic Degradation of Methylene Blue and Methyl Orange**

**Khaleel Al-hamoud<sup>1</sup>, Mohammed Rafi Shaik<sup>1</sup>, Merajuddin Khan<sup>1,\*</sup>, Hamad Z. Alkathlan<sup>1</sup>, Syed Farooq Adil<sup>1</sup>, Mufsir Kuniyil<sup>1</sup>, Mohamed E. Assal<sup>1</sup>, Abdulrahman Al-Warthan<sup>1</sup>, Mohammed Rafiq H. Siddiqui<sup>1</sup>, Muhammad Nawaz Tahir<sup>2,3</sup>, Shams Tabrez Khan<sup>4</sup>, Ahmad Amine Mousa<sup>1</sup>, and Mujeeb Khan<sup>1,\*</sup>**

<sup>1</sup>Department of Chemistry, College of Science, King Saud University, P.O. Box 2455, Riyadh 11451, Saudi Arabia

<sup>2</sup>Department of Chemistry, King Fahd University of Petroleum & Minerals, P.O. Box 5048, Dhahran 31261, Saudi Arabia

<sup>3</sup>Interdisciplinary Research Center for – Hydrogen and Energy Storage (IRC-HES), King Fahd University of Petroleum and & Minerals, Dhahran 31261, Saudi Arabia

<sup>4</sup>Department of Agricultural Microbiology, Aligarh Muslim University, Aligarh 2002002 UP, India

\* Authors to whom correspondence should be addressed. mkhan3@ksu.edu.sa (Me. K.); kmujeeb@ksu.edu.sa (Mu. K.)

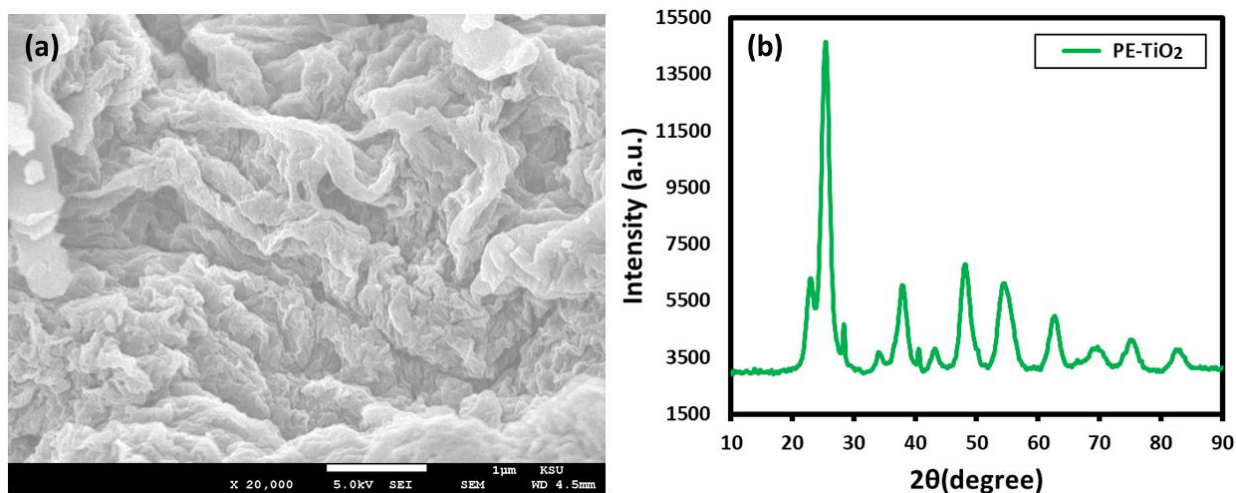

**Figure S1:** a) SEM analysis and b) XRD analysis of reused photocatalyst PE-TiO<sub>2</sub> NPs.
